# Supplementary material for: Impact of Genetic Heterogeneity in Polymerase of Hepatitis B Virus on Dynamics of Viral Load and Hepatitis B Progression
Source: PubMed Central journal article supplement (PMC3728348; doi:10.1371/journal.pone.0070169), 2013-07-30
Supplement: pone.0070169.s002.pdf [file pone.0070169.s002.pdf]

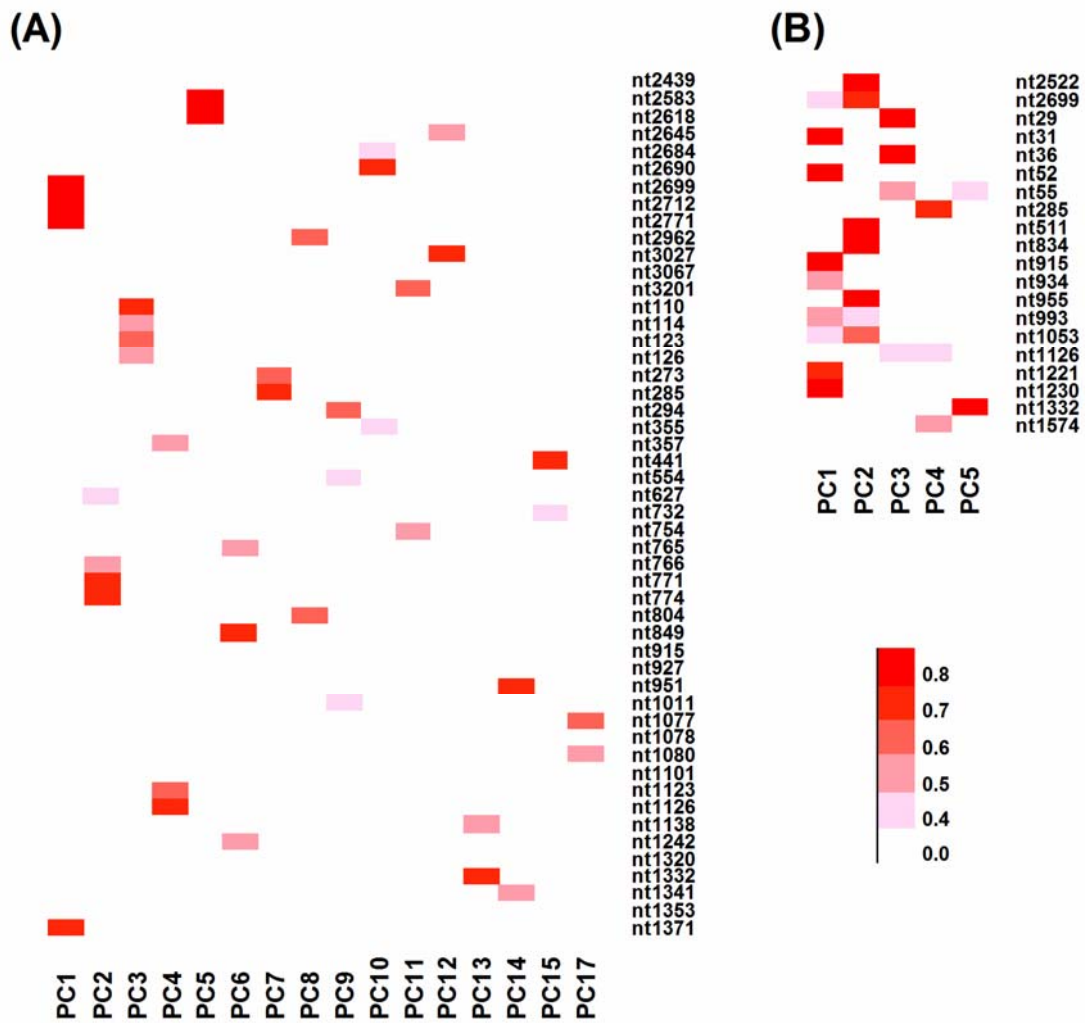

**Figure S2. Principal component (PC) analysis visualization for the cluster structure of viral load-associated viral single nucleotide polymorphisms with p values of  $\leq 0.01$ .** Shown are top PCs with eigenvalues  $> 1$  that contain covarying viral SNPs in HBV subgenotype Ba (A) and Ce (B) group, respectively. The histogram bars are shown in color for factor-loading scores (a measure of the importance of the corresponding nucleotide variant type in defining particular PC). PC-correlated SNPs were those SNPs that shared  $\geq 16\%$  of the variance with the PC, corresponding to a factor-loading score (i.e., correlation) of  $\geq 0.4$ .
