# Supplementary material for: Impact of Genetic Heterogeneity in Polymerase of Hepatitis B Virus on Dynamics of Viral Load and Hepatitis B Progression
Source: PubMed Central journal article supplement (PMC3728348; doi:10.1371/journal.pone.0070169), 2013-07-30
Supplement: pone.0070169.s006.pdf [file pone.0070169.s006.pdf]

**Table S3. Baseline characteristics and follow-up in study population<sup>a</sup>.**

|                                                                   | Total      | Natural history of chronic HBV infection <sup>b</sup> |           |            |           |
|-------------------------------------------------------------------|------------|-------------------------------------------------------|-----------|------------|-----------|
|                                                                   |            | IT                                                    | IC        | LR         | ENH       |
| <b>Entire sample, n</b>                                           | 1143       | 86                                                    | 23        | 932        | 71        |
| Cigarette smoking, n (%)                                          | 356 (31.2) | 27 (31.4)                                             | 8 (34.8)  | 294 (31.6) | 21 (29.6) |
| Alcohol consumption, n (%)                                        | 239 (20.9) | 12 (14.0)                                             | 6 (26.1)  | 199 (21.4) | 13 (18.3) |
| Body mass index, mean±SD, kg/m <sup>2c</sup>                      | 23.8±2.6   | 23.9±2.4                                              | 23.3±2.7  | 23.7±2.6   | 25.0± 2.6 |
| Elevated ALT≥1 visit, n (%) <sup>c</sup>                          | 423 (41.2) | 55 (72.4)                                             | 16 (76.2) | 305 (36.1) | 38 (65.5) |
| Elevated AST≥1 visit, n (%) <sup>c</sup>                          | 317 (30.9) | 45 (59.2)                                             | 13 (61.9) | 223 (26.4) | 30 (51.7) |
| Trajectory patterns of viral load during follow-up <sup>c,d</sup> |            |                                                       |           |            |           |
| Sustained low, n (%)                                              | 686 (60.0) | 8 (9.3)                                               | 4 (17.4)  | 621 (66.6) | 34 (47.9) |
| Sustained high, n (%)                                             | 367 (32.1) | 16 (18.6)                                             | 6 (26.1)  | 299 (32.1) | 34 (47.9) |
| Extremely high to low, n (%)                                      | 90 (7.9)   | 62 (72.1)                                             | 13 (56.5) | 12 (1.3)   | 3 (4.2)   |
| <b>Inclusion for sequence analysis</b>                            |            |                                                       |           |            |           |
| Plasma HBV DNA≥1000 copies/mL, n                                  | 867        | 83                                                    | 23        | 674        | 59        |
| Successful sequencing, n                                          | 575        | 64                                                    | 13        | 443        | 36        |
| Cigarette smoking, n (%)                                          | 180 (31.3) | 20 (31.3)                                             | 4 (30.8)  | 140 (31.6) | 12 (33.3) |
| Alcohol consumption, n (%)                                        | 125 (21.7) | 8 (12.5)                                              | 3 (23.1)  | 102 (23.0) | 6 (16.7)  |
| Body mass index, mean±SD, kg/m <sup>2c</sup>                      | 23.6±2.7   | 23.7±2.4                                              | 23.4±2.3  | 23.5±2.7   | 24.8±2.7  |
| Elevated ALT≥1 visit, n (%) <sup>c</sup>                          | 235 (46.3) | 40 (72.7)                                             | 10 (90.9) | 163 (40.8) | 14 (51.9) |
| Elevated AST≥1 visit, n (%) <sup>c</sup>                          | 183 (36.0) | 35 (63.6)                                             | 8 (72.7)  | 121 (30.3) | 14 (51.9) |
| Trajectory patterns of viral load during follow-up <sup>c,d</sup> |            |                                                       |           |            |           |
| Sustained low, n (%)                                              | 251 (43.7) | 4 (6.3)                                               | 1 (7.7)   | 223 (50.3) | 13 (36.1) |
| Sustained high, n (%)                                             | 252 (43.8) | 7 (10.9)                                              | 3 (23.1)  | 213 (48.1) | 20 (55.6) |
| Extremely high to low, n (%)                                      | 72 (12.5)  | 53 (82.8)                                             | 9 (69.2)  | 7 (1.6)    | 3 (8.3)   |

ALT, alanine aminotransferase; AST, aspartate aminotransferase; ENH, HBeAg negative hepatitis; HBV, hepatitis B virus; IT, immune-tolerant; IC, immune-clearance; LR, non/low-replicative.

<sup>a</sup>Total number of subjects may vary because of missing value due to PCR/sequencing failure or nonparticipation in follow-up examination.

<sup>b</sup>31 subjects with missing data on baseline ALT levels or HBeAg status were excluded from analysis of natural history.

<sup>c</sup> $P < 0.05$  between the four phases of natural history determined with Kruskal-Wallis test (continuous variable) or  $\chi^2$  test (categorical variable).

<sup>d</sup>Three patterns of time trend for viral load were defined based on 7706 serial samples collected from 1143 subjects during 16 years of follow-up according to our previous longitudinal viral-load study [reference 13].
