# Supplementary material for: Impact of Genetic Heterogeneity in Polymerase of Hepatitis B Virus on Dynamics of Viral Load and Hepatitis B Progression
Source: PLOS journal article supplement (doi:10.1371/journal.pone.0070169), 2013-07-30
Supplement: S1 (10.1371/journal.pone.0070169.s001) [file journal.pone.0070169.s001]

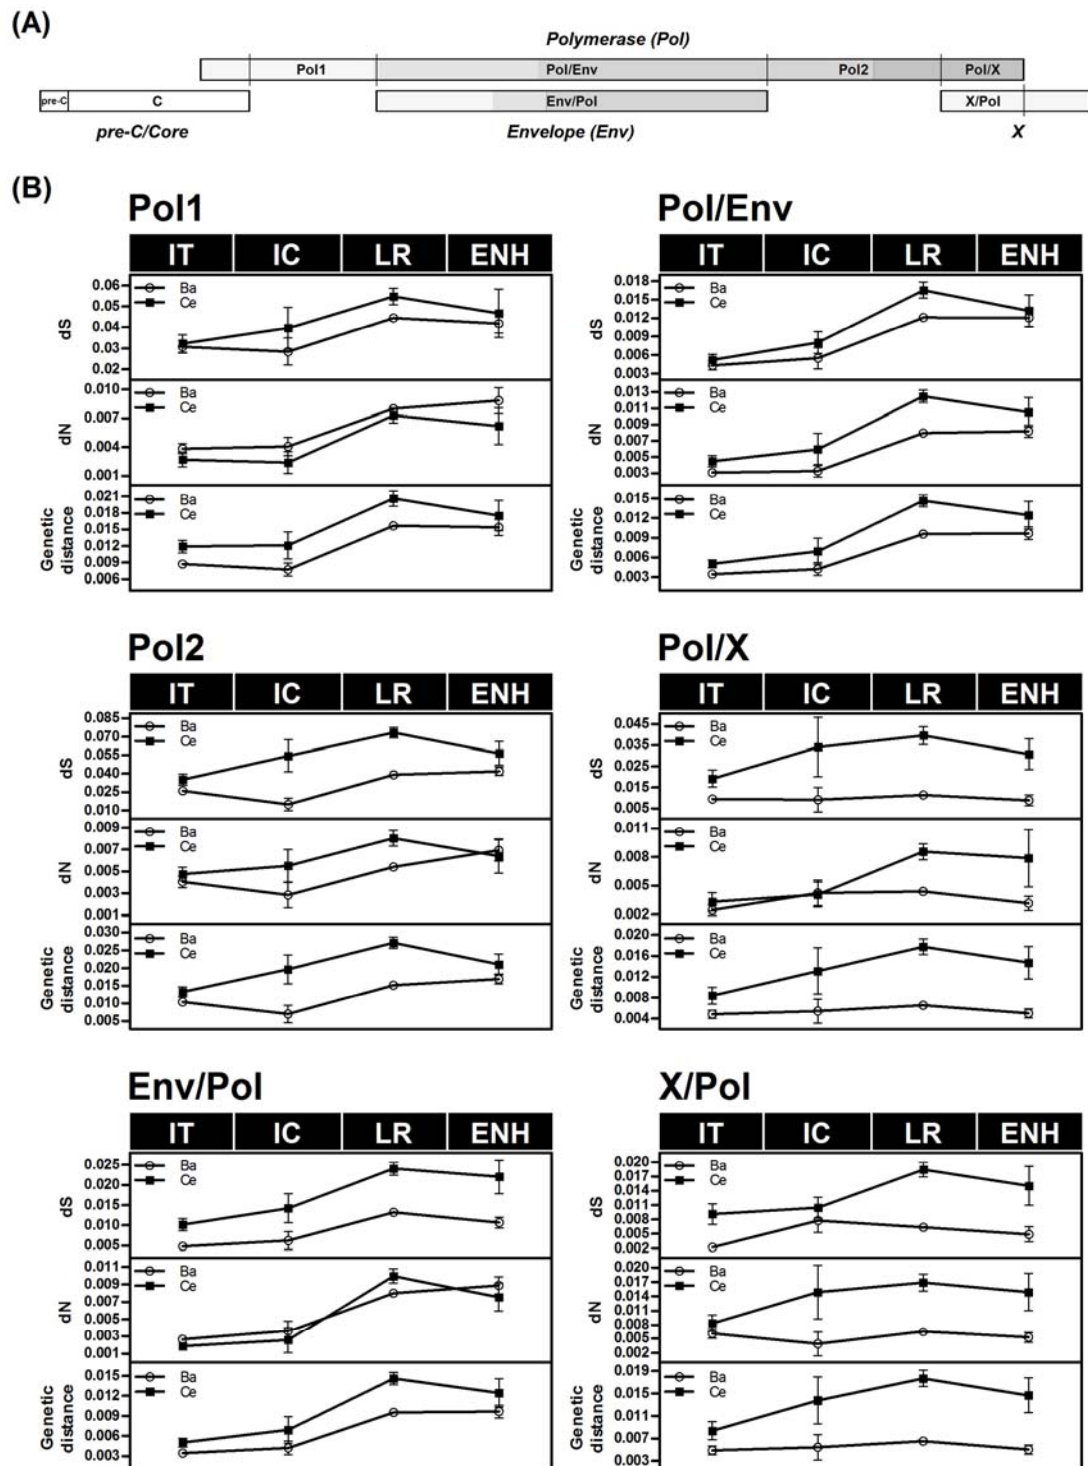

**Figure S1. Comparisons in changing patterns of viral genetic diversity across the four phases of HBV-infection between overlapping and nonoverlapping reading frames.** (A) The structure of the genes across a 2403-bp stretch in the sequence region. (B) Parameters of viral genetic diversity in different phases of HBV-infection. The polymerase region selected for analysis contains two nonoverlapping regions of the polymerase gene: nt2453-2847 and nt836-1373, and two overlapping open reading frames (ORFs): the largest overlapping ORF (1203-bp) of the HBV genome, which encodes polymerase and envelope, and a 250-bp overlapping ORF of polymerase and X.
